# Supplementary material for: Retracted Article: Spatially resolved mechanical properties of photo-responsive azobenzene-based supramolecular gels
Source: Royal Society of Chemistry journal article supplement (doi:10.1039/c7ra03797j), 2017-01-01
Supplement: c7ra03797j1.pdf [file c7ra03797j1.pdf]

**【Electronic Supplementary Information】**

**Spatially resolved mechanical properties of photo-responsive azobenzene-based supramolecular gels**

Gyuri Mun,<sup>#a</sup> Heekyoung Choi,<sup>#a</sup> Nayoung Im,<sup>a</sup> Junho Ahn,<sup>a</sup> Jaehyeon Park,<sup>a</sup> Hyowon Seo,<sup>a</sup>  
Yeonweon Choi,<sup>a</sup> Ji Ha Lee<sup>\*a,b</sup> and Jong Hwa Jung<sup>\*a</sup>

*Department of Chemistry and Research Institute of Natural Sciences Gyeongsang National  
University, Jinju 660-701, Korea*

*Department of Chemistry and Biochemistry, The University of Kitakyushu, HiBikino,  
Kitakyushu 808-013, Japan*

E-mail: [jonghwa@gnu.ac.kr](mailto:jonghwa@gnu.ac.kr)

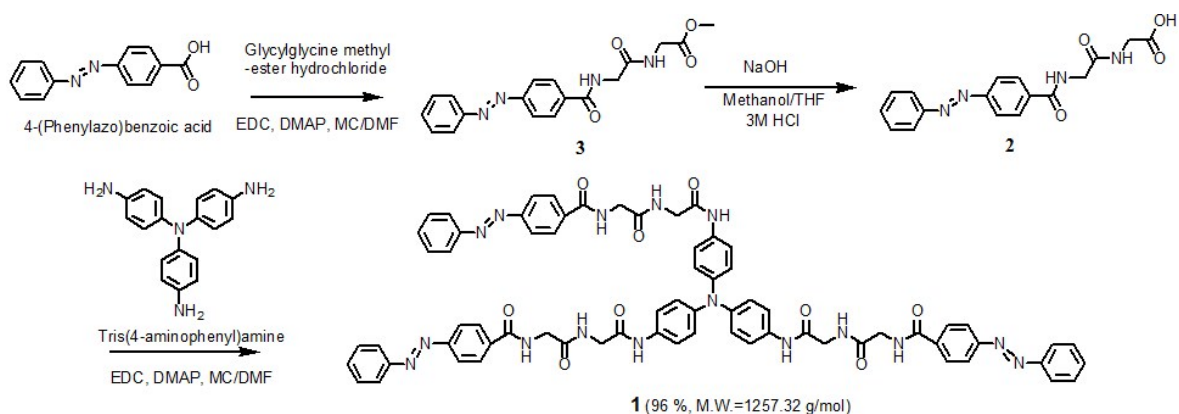

**Scheme S1.** Schematic of synthetic methods for compounds **1**.

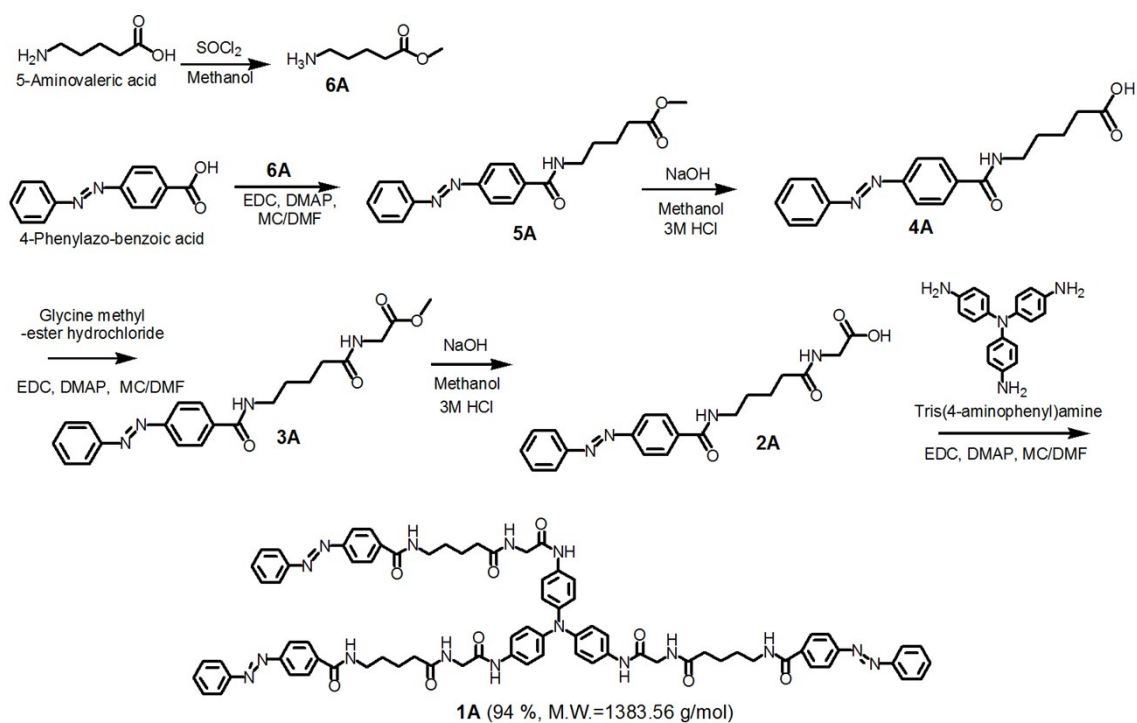

**Scheme S2.** Schematic of synthetic methods for compounds **1A**.

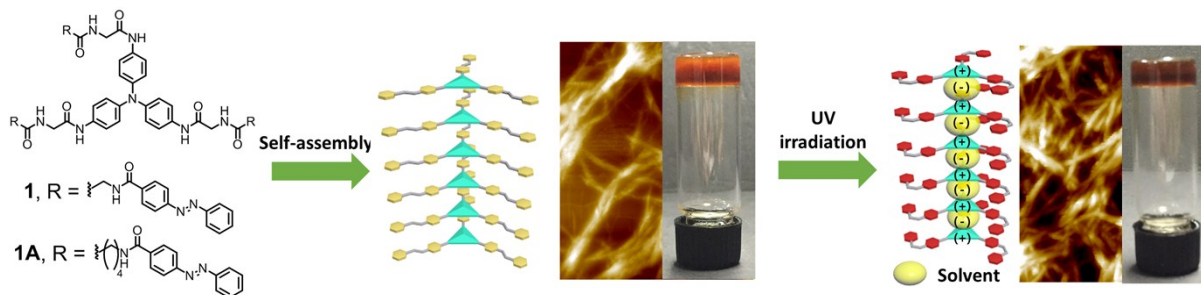

**Fig. S1** Illustration showing self-assembly of gelator molecules and its conformational change under UV irradiation.

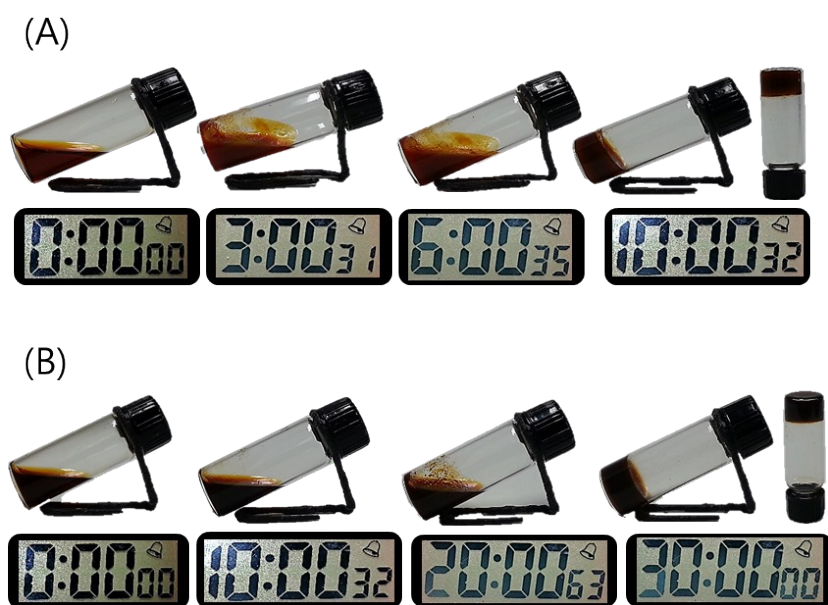

**Fig. S2** The photograph of supramolecular gel (A) **1** and (B) **1A** by aging times.

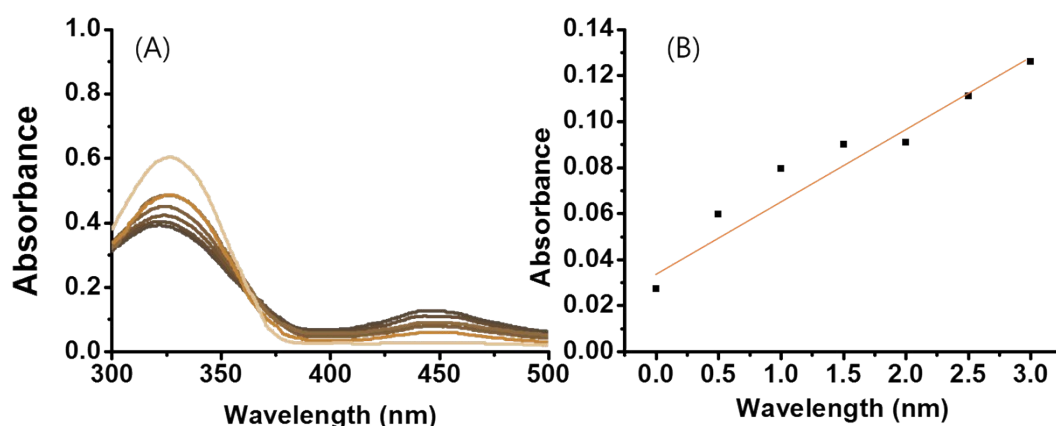

**Fig. S3** (A) UV spectra of supramolecular gel **1A** by UV irradiation. (B) Plot of the absorbance bands of gel **1A** at 450 nm.

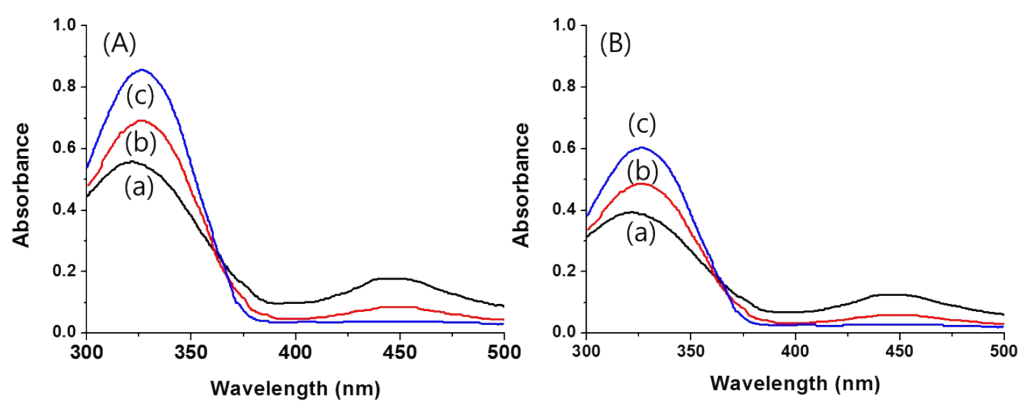

**Fig. S4** UV spectra of supramolecular gels (A) **1** and (B) **1A** recovered from *cis* to *trans* state by irradiation with visible light source (450 nm, 10mW/cm<sup>2</sup>). ((a) before and after irradiation for (b) 1h and (c) 3 h)

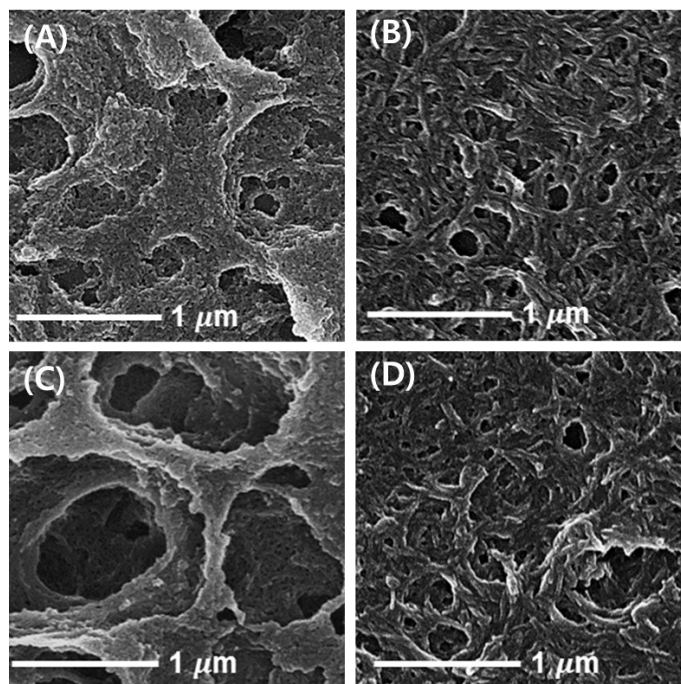

**Fig. S5** SEM images of supramolecular gel (A) **1**, (B) **1A**, cis-isomer (C) **1** and (D) **1A** by UV irradiation.

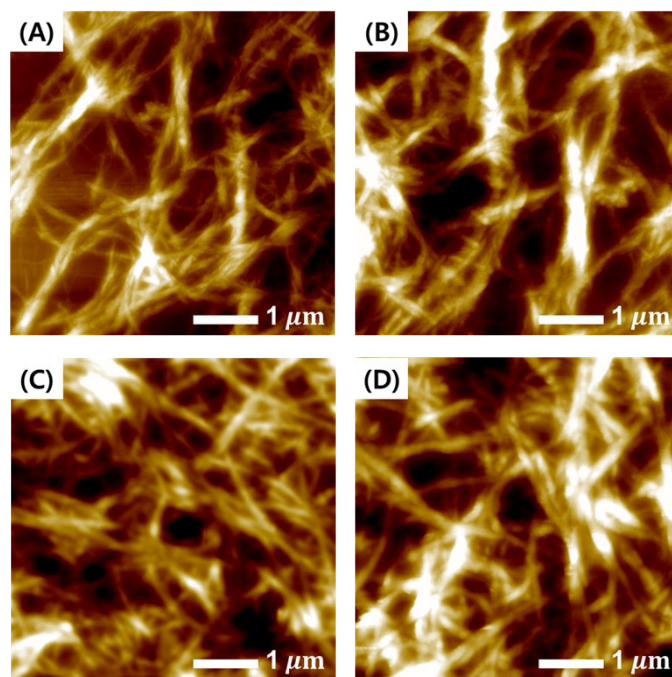

**Fig. S6** AFM images of supramolecular gel (A) **1**, (B) **1A**, cis-isomer (C) **1** and (D) **1A** by UV irradiation.

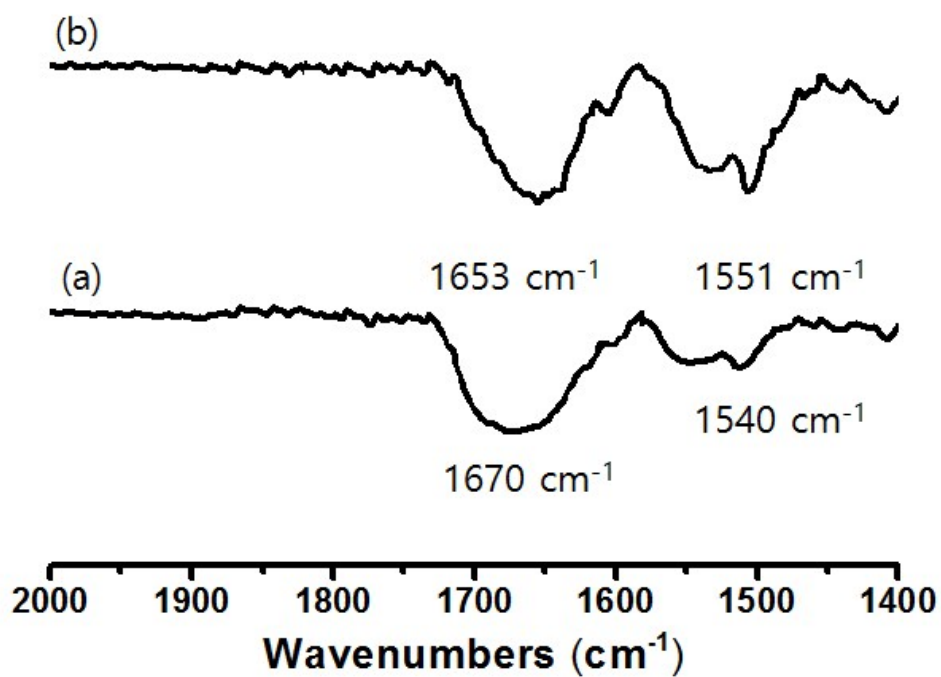

**Fig. S7** FTIR spectra of (a) gel-**1** and (b) compound **1** in homogeneous chloroform solution.

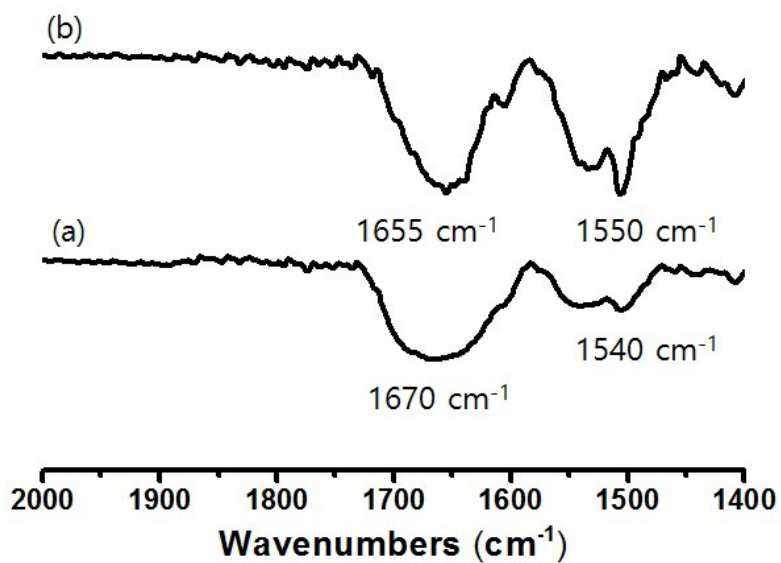

Fig. S8 FTIR spectra of (a) gel-1A and (b) compound 1A in homogeneous chloroform solution.

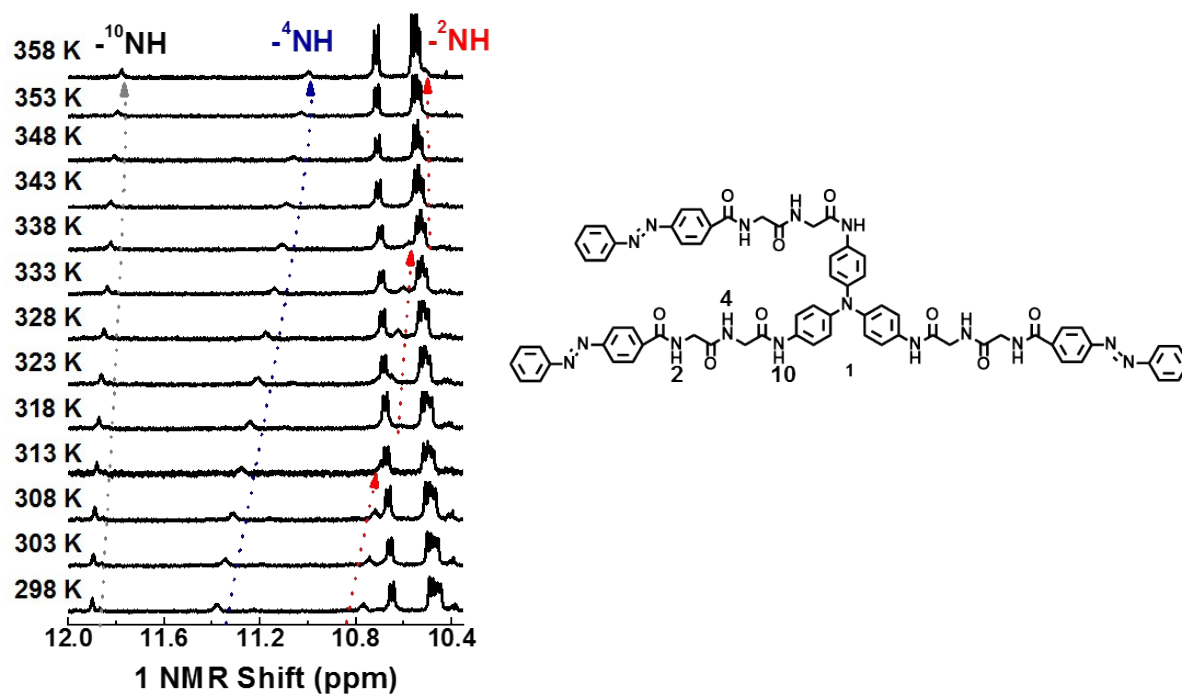

Fig. S9 VT NMR data of supramolecular gel 1 in  $\text{DMSO-d}_6/\text{CDCl}_3$  (1:5v/v, 0.5mL) at increasing temperatures.

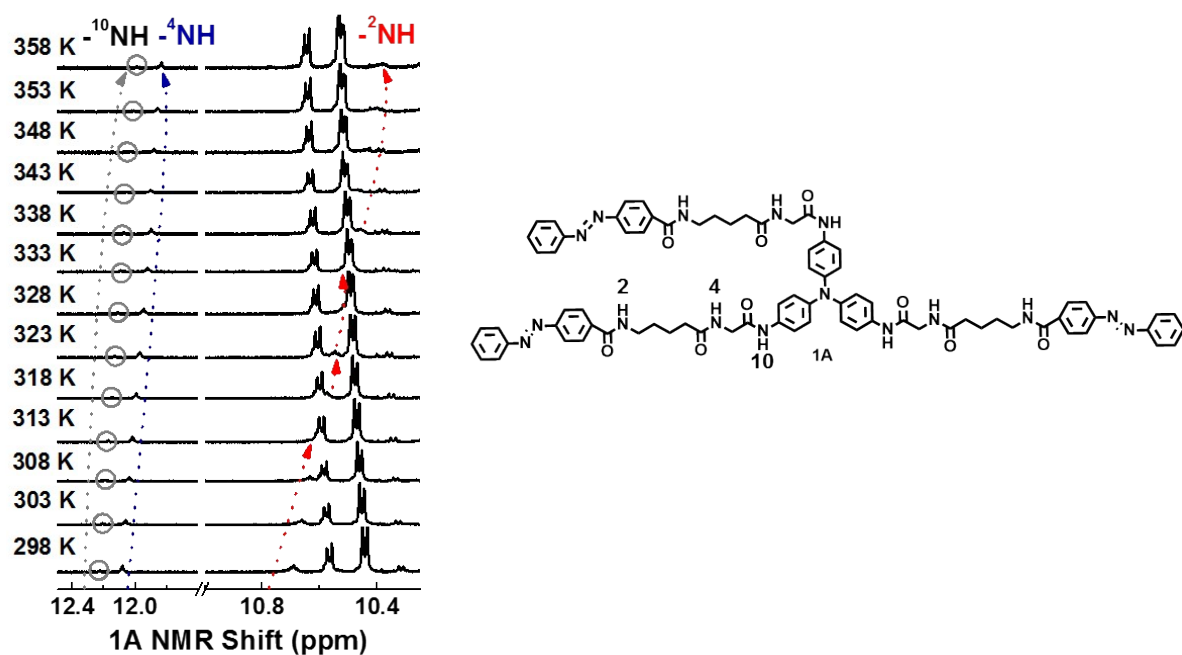

Fig. S10 VT NMR data of supramolecular gel 1A in DMSO-d<sub>6</sub>/CDCl<sub>3</sub> (1:5v/v, 0.5mL) at increasing temperatures.

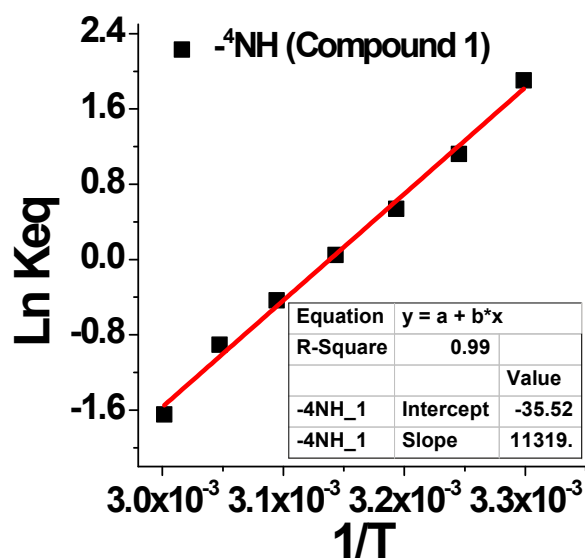

Fig. S11 The thermodynamic parameters for the gel-1 by the van't Hoff equation.

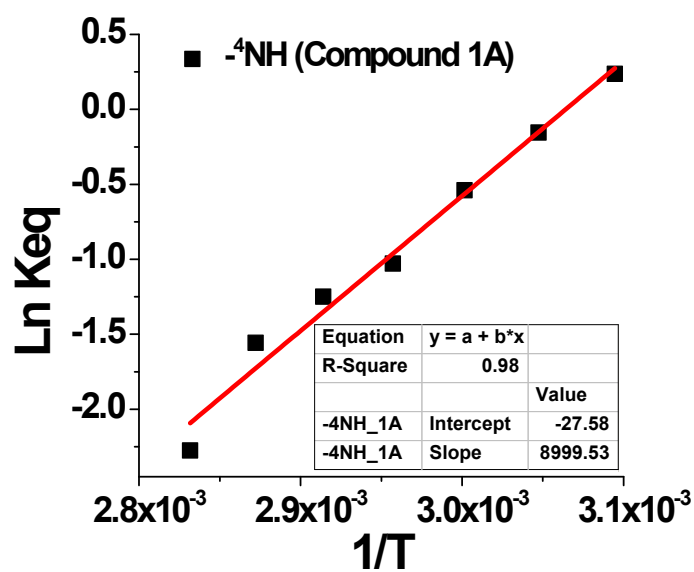

Fig. S12 The thermodynamic parameters for the gel-1A by the van't Hoff equation.

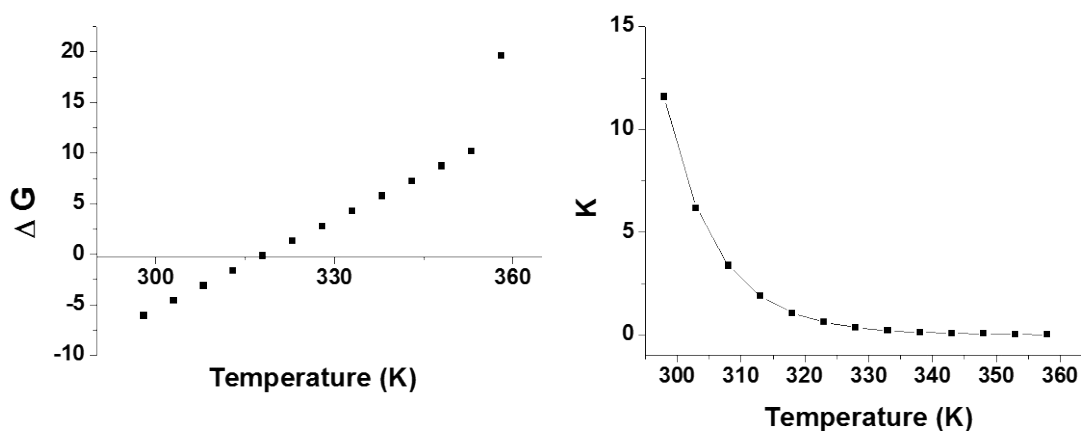

Fig. S13 The plot for association constants of gel 1 via temperatures.



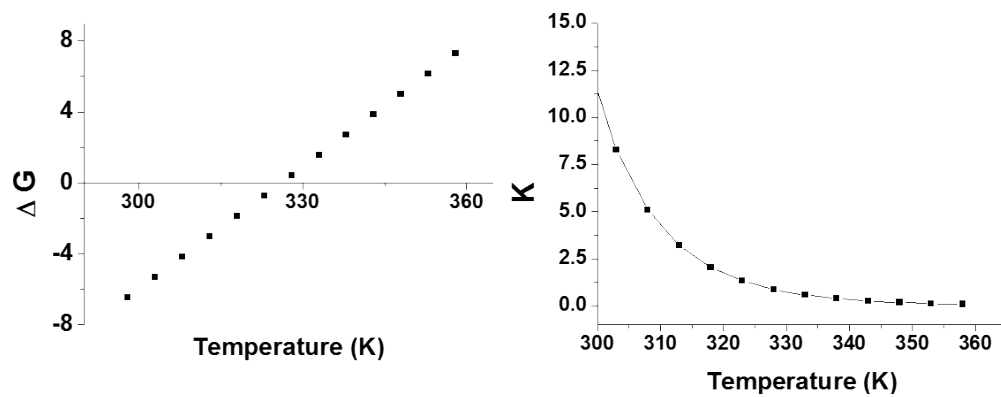

**Fig. S14** The plot for association constants of gel 1A via temperatures.

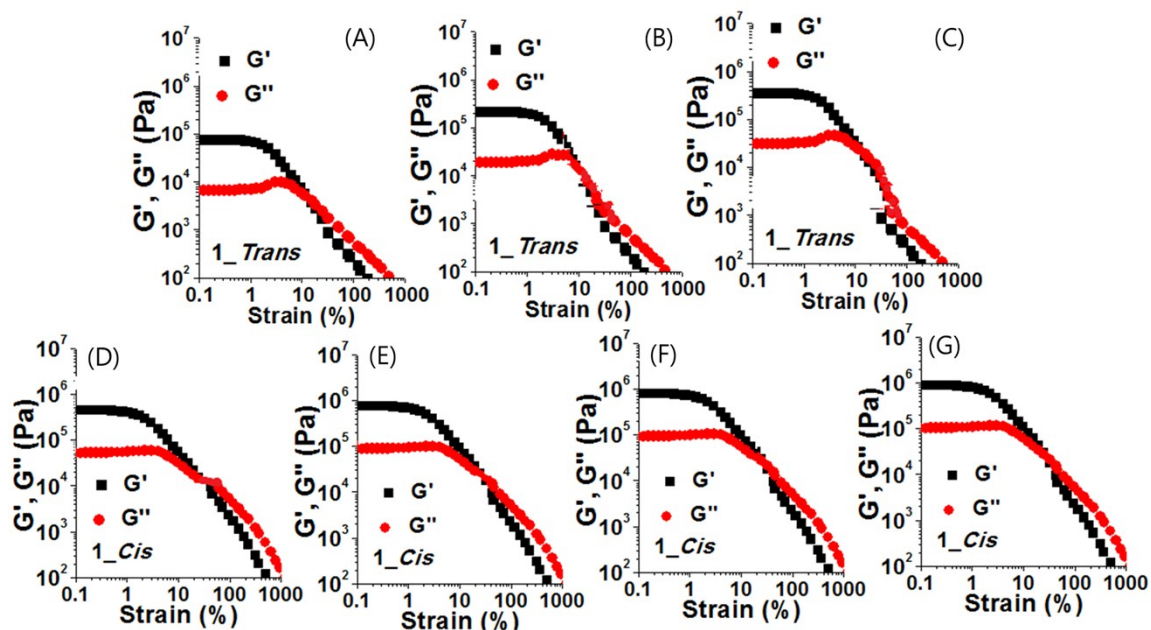

**Fig. S15** Strain sweep test results of gel 1 (A) before UV irradiation and after UV irradiation for (B) 0.5 h, (C) 1 h, (D) 1.5 h, (E) 2 h, (F) 2.5 h and (G) 3 h. (strain sweep tests at 0.1-1000, 0.1 Hz frequency).

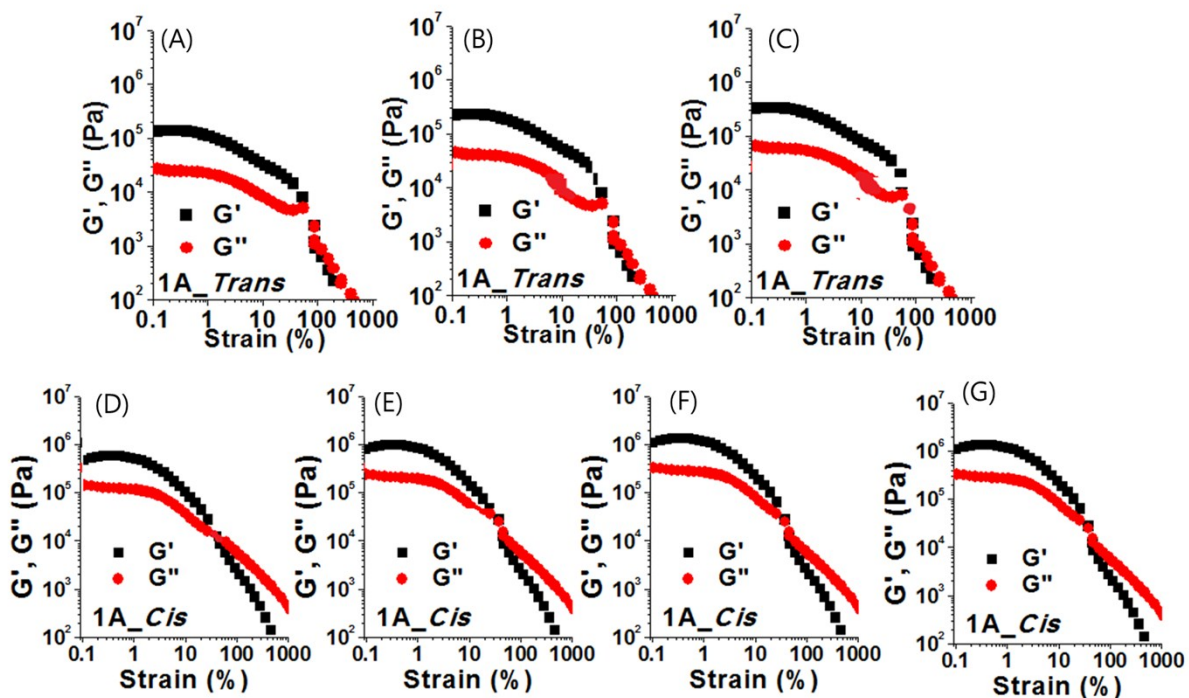

**Fig. S16** Strain sweep test results of gel 1A (A) before UV irradiation and after UV irradiation for (B) 0.5 h, (C) 1 h, (D) 1.5 h, (E) 2 h, (F) 2.5 h and (G) 3 h. (strain sweep tests at 0.1-1000, 0.1 Hz frequency).

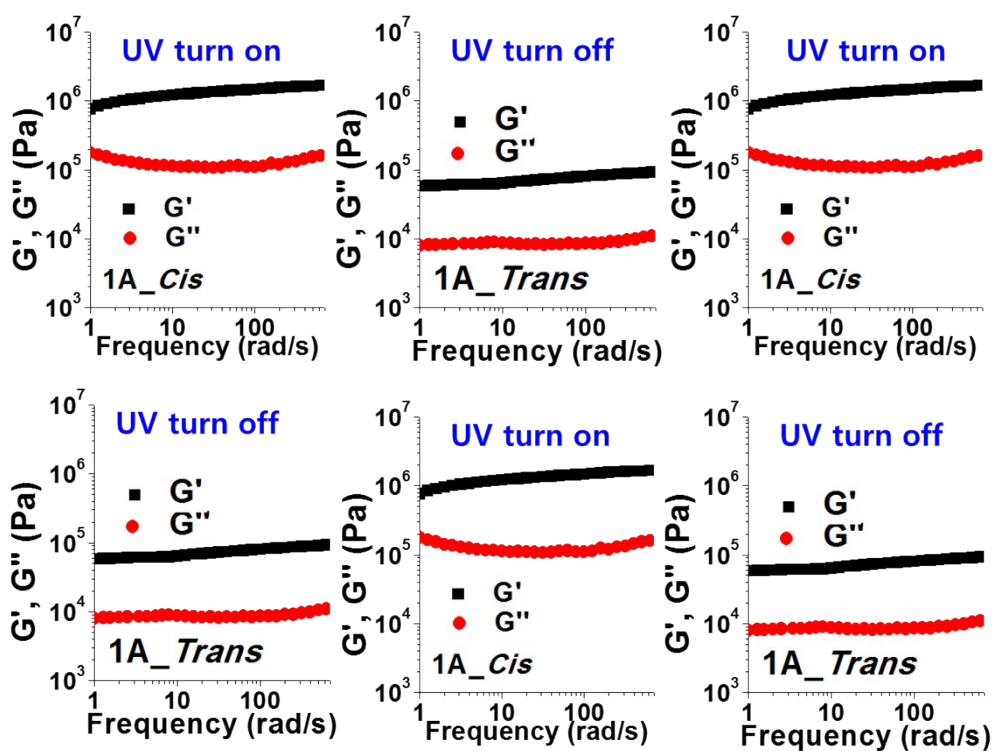

**Fig. S17** The recovery test (3 cycles) of gel **1A** by light (400nm, 10mW/cm<sup>2</sup>).

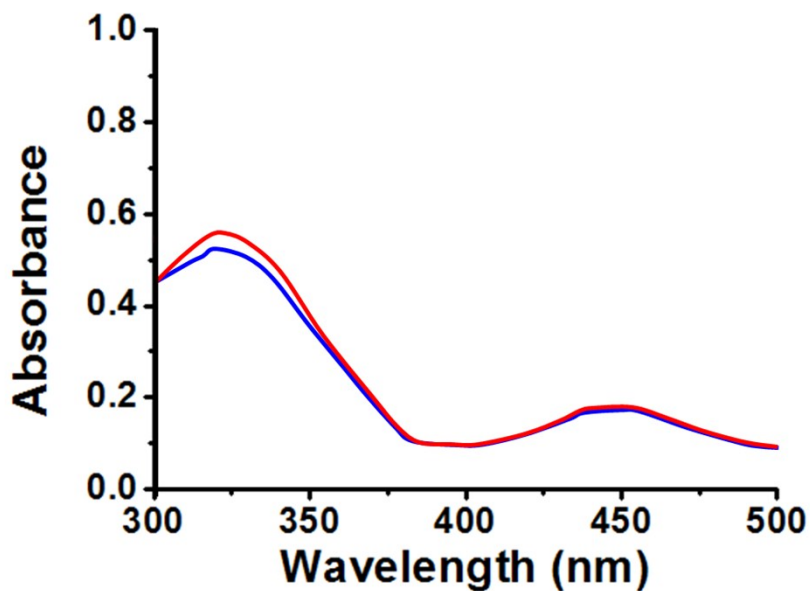

**Fig. S18** UV spectra of UV-irradiated gel **1** before (blue) and after (red) standing for 24 h in a darkroom.

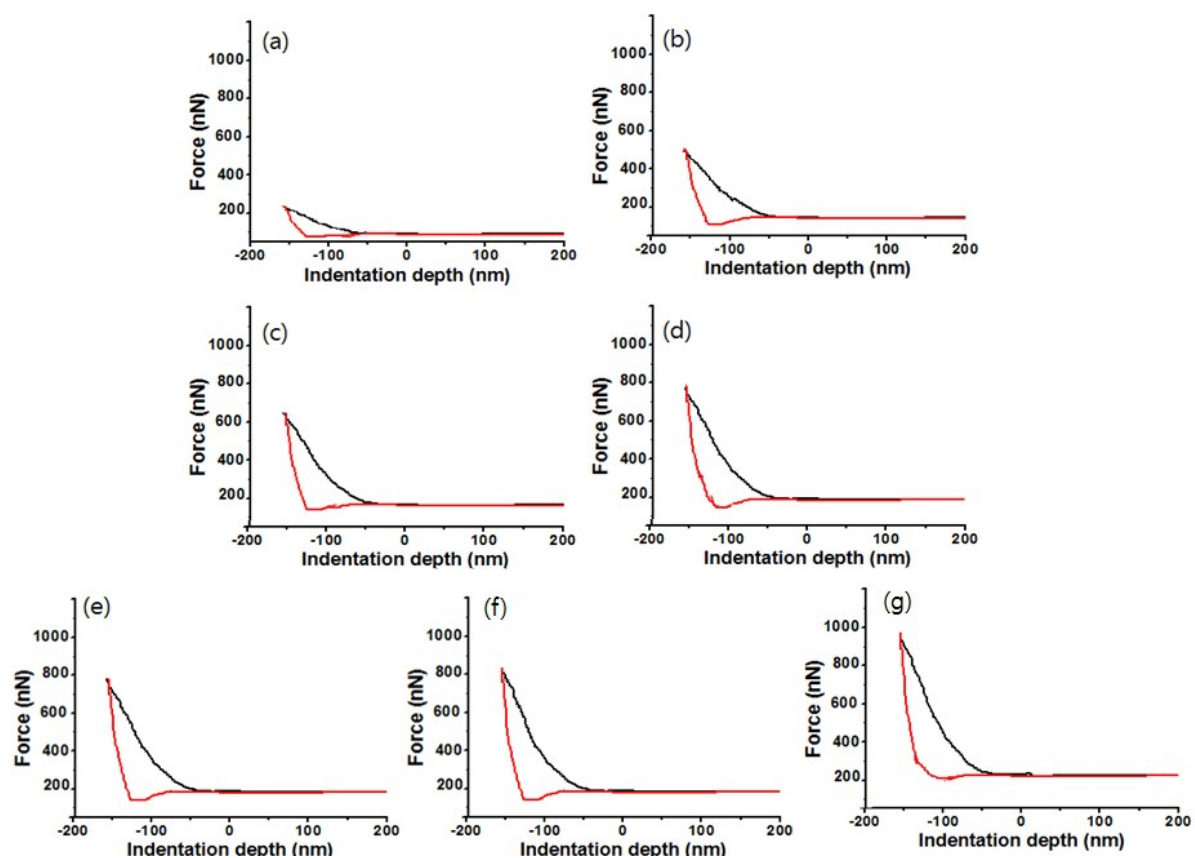

**Fig. S19** FD curves of supramolecular gel **1** (a) before UV irradiation and after UV irradiation for (b) 0.5 h, (c) 1 h, (d) 1.5 h, (e) 2 h (f) 2.5 h and (g) 3 h.

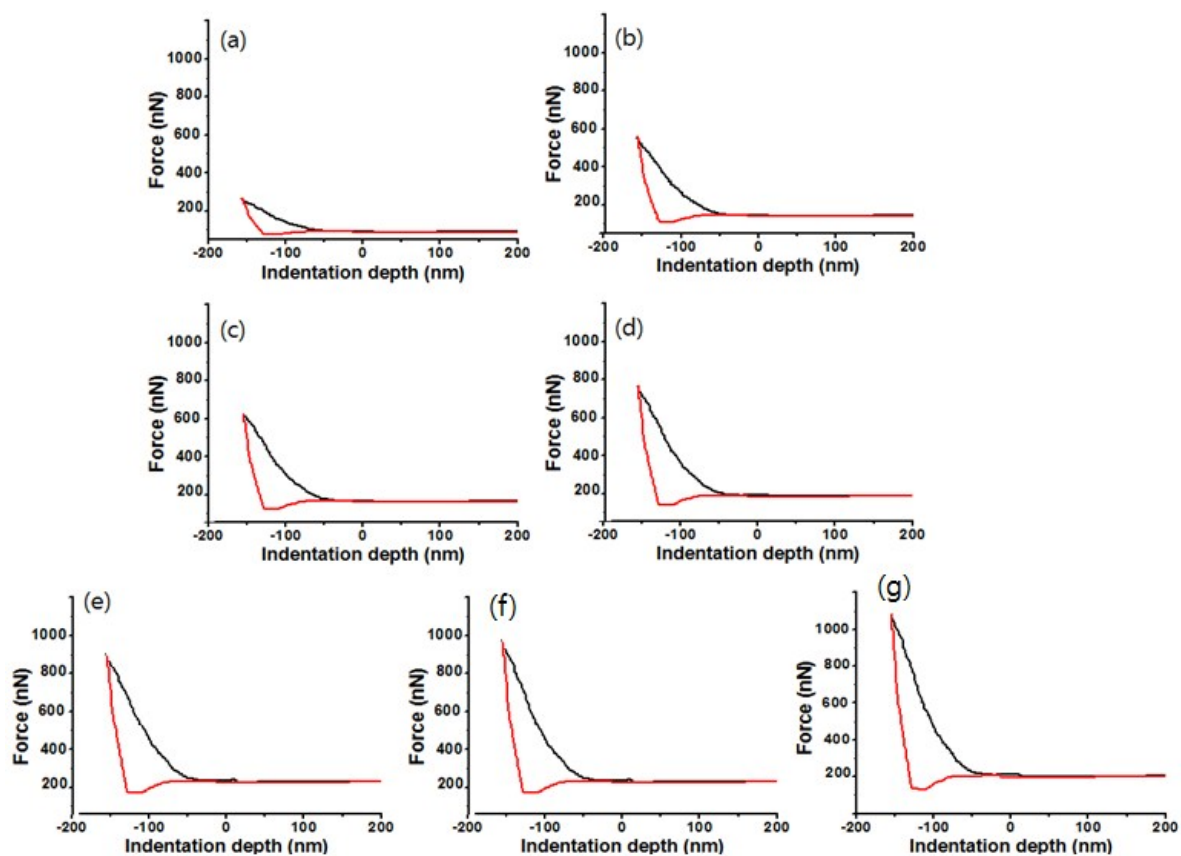

**Fig. S20** FD curves of supramolecular gel **1A** (a) before UV irradiation and after UV irradiation for (b) 0.5 h, (c) 1 h, (d) 1.5 h, (e) 2 h, (f) 2.5 h and (g) 3 h.

**Table S1.** The formation of supramolecular gels in various solvents.

(gelator 25 mg, solvent 1 mL)

| Solvent                   | Gelator <b>1</b> and <b>1A</b> | Solvent | Gelator <b>1</b> and <b>1A</b> |
|---------------------------|--------------------------------|---------|--------------------------------|
| DMSO/chloroform(1:5, v:v) | G                              | Water   | I                              |
| DMF                       | S                              | DCM     | I                              |
| DMSO                      | S                              | EA      | I                              |
| THF                       | LS                             | Tol     | I                              |
| MeOH                      | LS                             | ACN     | I                              |
| CHCl <sub>3</sub>         | LS                             | n-Hex   | I                              |

G=gelation, I=insoluble, S=solution, LS=light solution

**Table S2.** The association constants of gel **1** at various temperatures.

| <b>1</b>   | 298K  | 303K  | 308K  | 313K  | 318K  | 323K | 328K | 333K | 338K | 343K  | 348K  | 353K  | 358K  |
|------------|-------|-------|-------|-------|-------|------|------|------|------|-------|-------|-------|-------|
| $\Delta G$ | -6.07 | -4.59 | -3.12 | -1.64 | -0.16 | 1.31 | 2.79 | 4.27 | 5.75 | 7.22  | 8.70  | 10.18 | 19.63 |
| K          | 11.59 | 6.18  | 3.38  | 1.88  | 1.06  | 0.61 | 0.37 | 0.21 | 0.13 | 0.079 | 0.049 | 0.031 | 0.001 |

**Table S3.** The association constants of gel **1A** at various temperatures.

| <b>1A</b>  | 298K  | 303K  | 308K  | 313K  | 318K  | 323K  | 328K | 333K | 338K | 343K | 348K | 353K | 358K  |
|------------|-------|-------|-------|-------|-------|-------|------|------|------|------|------|------|-------|
| $\Delta G$ | -6.47 | -5.32 | -4.18 | -3.03 | -1.88 | -0.74 | 0.41 | 1.55 | 2.70 | 3.85 | 4.99 | 6.14 | 7.29  |
| K          | 13.61 | 8.27  | 5.11  | 3.20  | 2.01  | 1.32  | 0.86 | 0.57 | 0.38 | 0.26 | 0.18 | 0.12 | 0.086 |
